# Supplementary material
Source: PubMed Central journal article supplement (PMC4114940)
Supplement: supp_tpc.114.124032_tpc124032_SupplementalData.pdf [file supp_tpc.114.124032_tpc124032_SupplementalData.pdf]

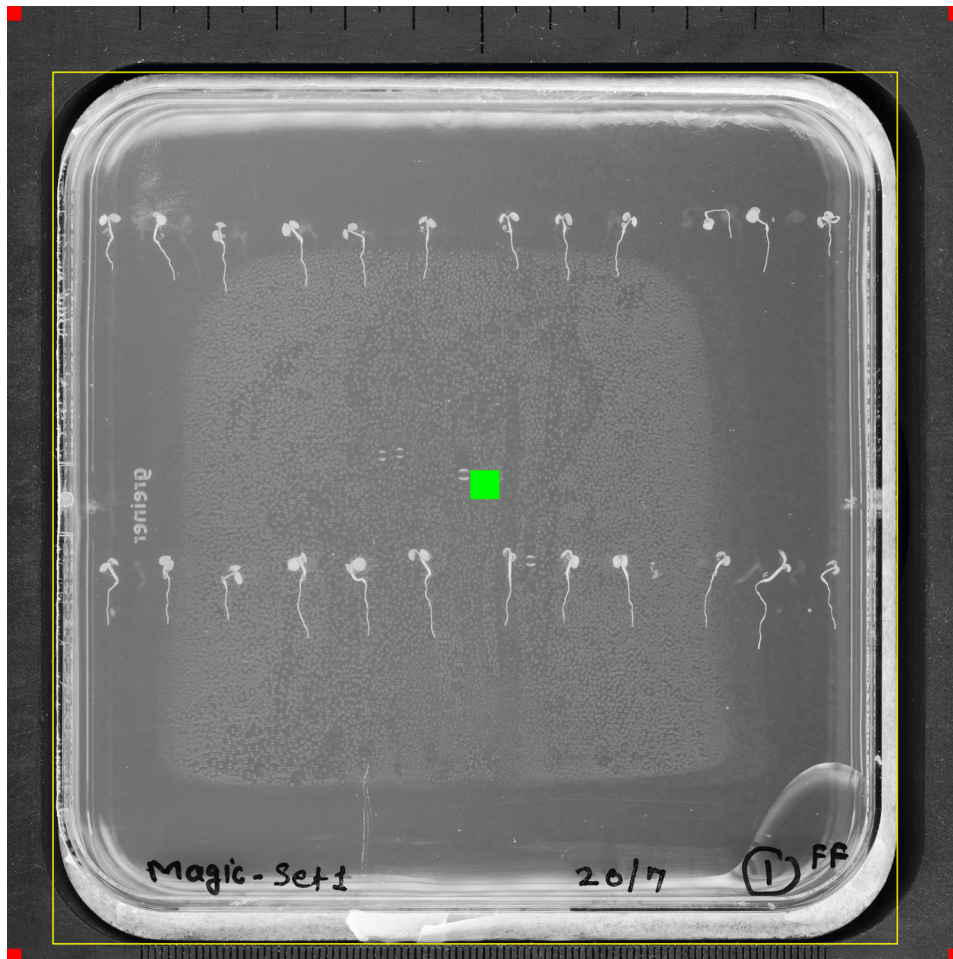

### Supplemental Figure 1. Detection of the plate's area

A greyscale representation of the original image is used to detect the plate area. Areas at the corners (red squares) and center of the image (green square) are used to calculate the upper and lower threshold value. Due to the rounded corners of the used plate, this method would succeed even if the image was cropped by the user before supplying it to the pipeline. The detected region of interest (ROI) is shown as yellow rectangle.

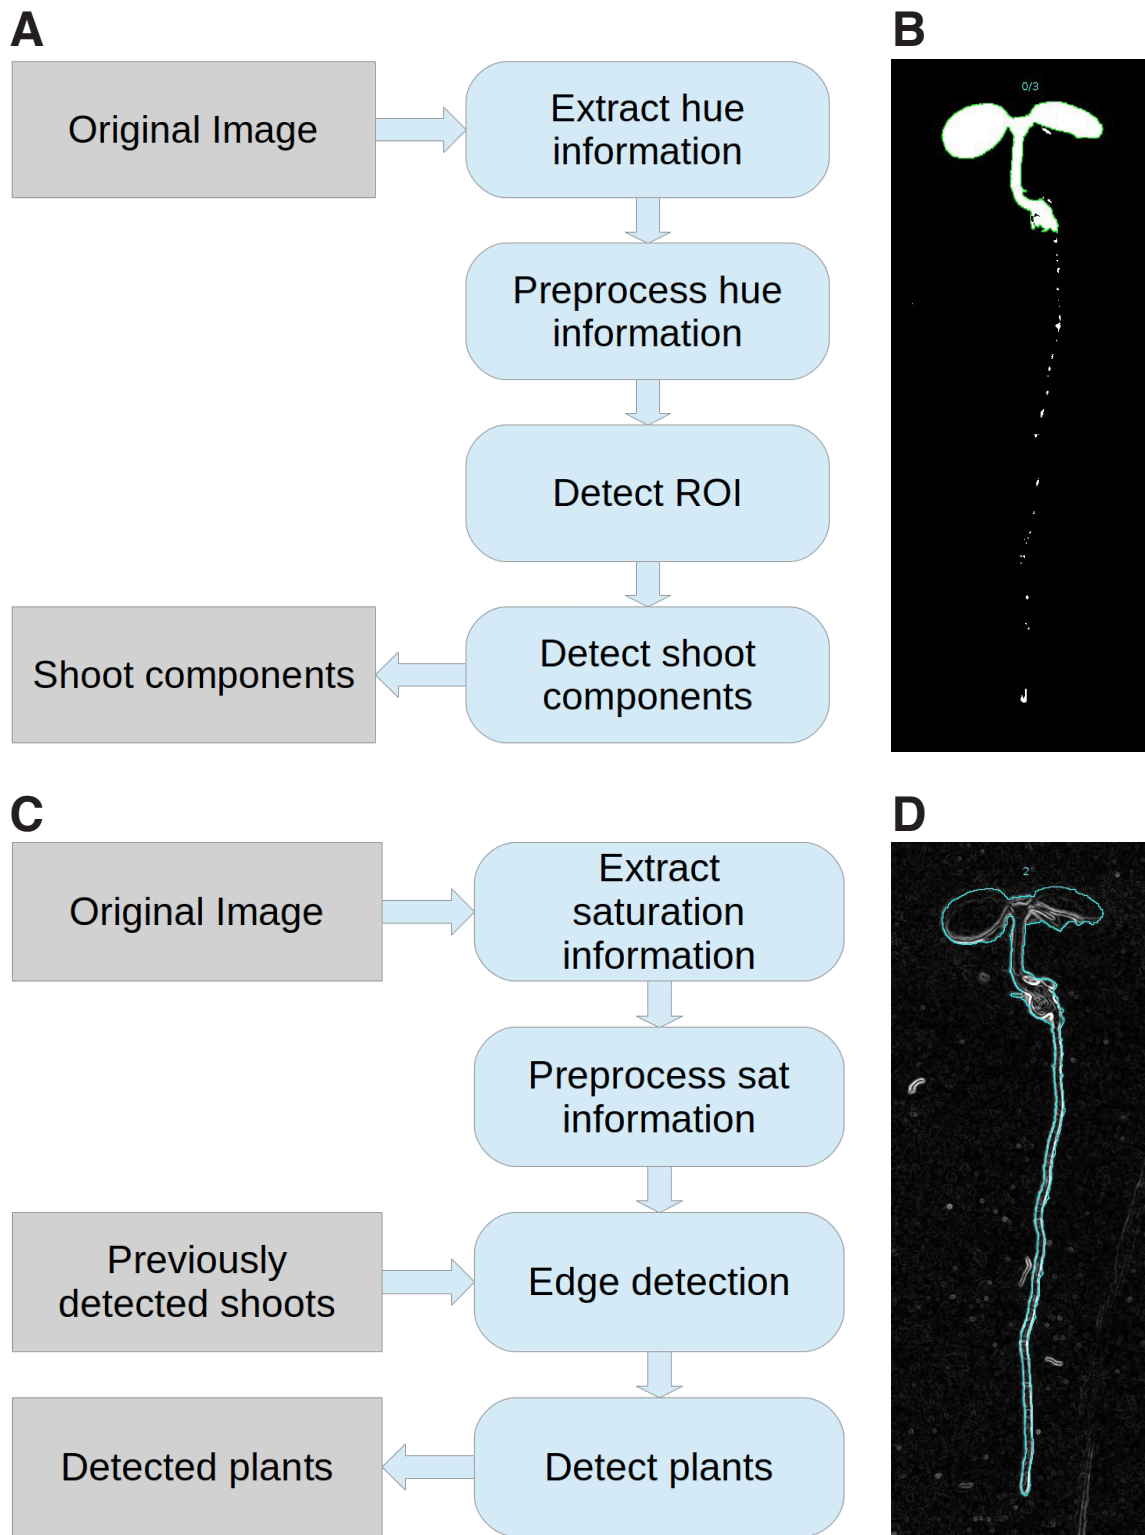

**Supplemental Figure 2.** Plant and shoot detection algorithms of BRAT

**(A)** The schematic of the shoot detection algorithm.

**(B)** A typical result of the shoot detection shown as binary (black/white) representation produced by the algorithm. The detected shoot parts are marked with a green outline.

**(C)** Schematic of the plant detection algorithm.

**(D)** A typical result of the plant detection. The outline of the detected plant is shown in cyan.

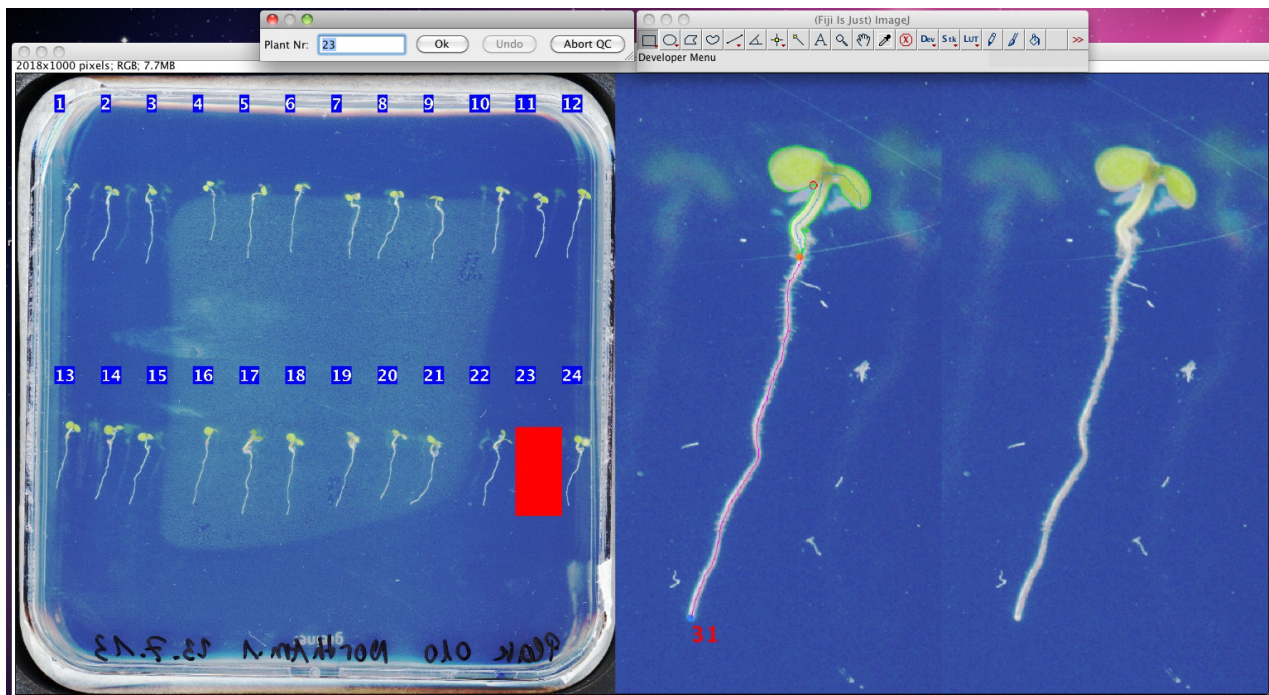

**Supplemental Figure 3.** Screenshot of the optional BRAT quality control interface

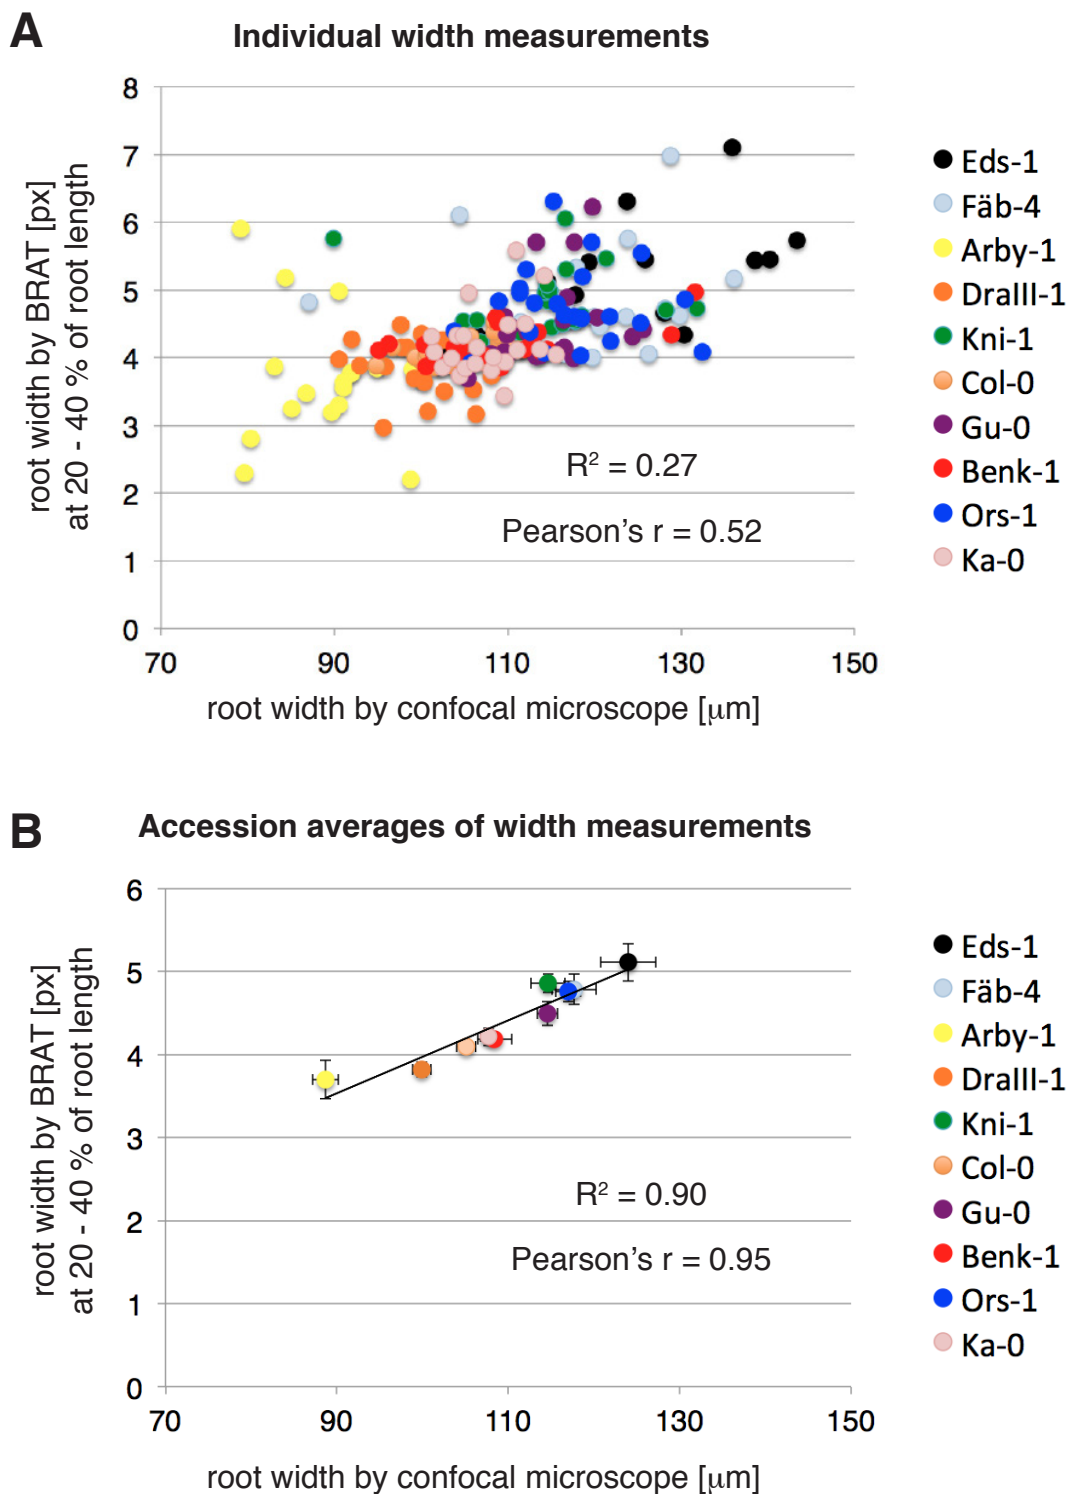**Supplemental Figure 4.**

Correlation of root width measurements: BRAT vs. confocal microscopy

**(A)** Correlation of root width measurements of individual plants of ten accessions using measurements from BRAT (y-axis) and confocal microscopy (x-axis) in the longitudinal interval of 20-40% of root length starting from the hypocotyl/root boundary. Confocal measures are three point averages calculated from width measurements at 20, 30 and 40% of root length. BRAT root width 40 measurements correspond to average of root width at 20 - 40% of root length.

**(B)** Accession averages and standard error of the mean for data shown in **(A)**.

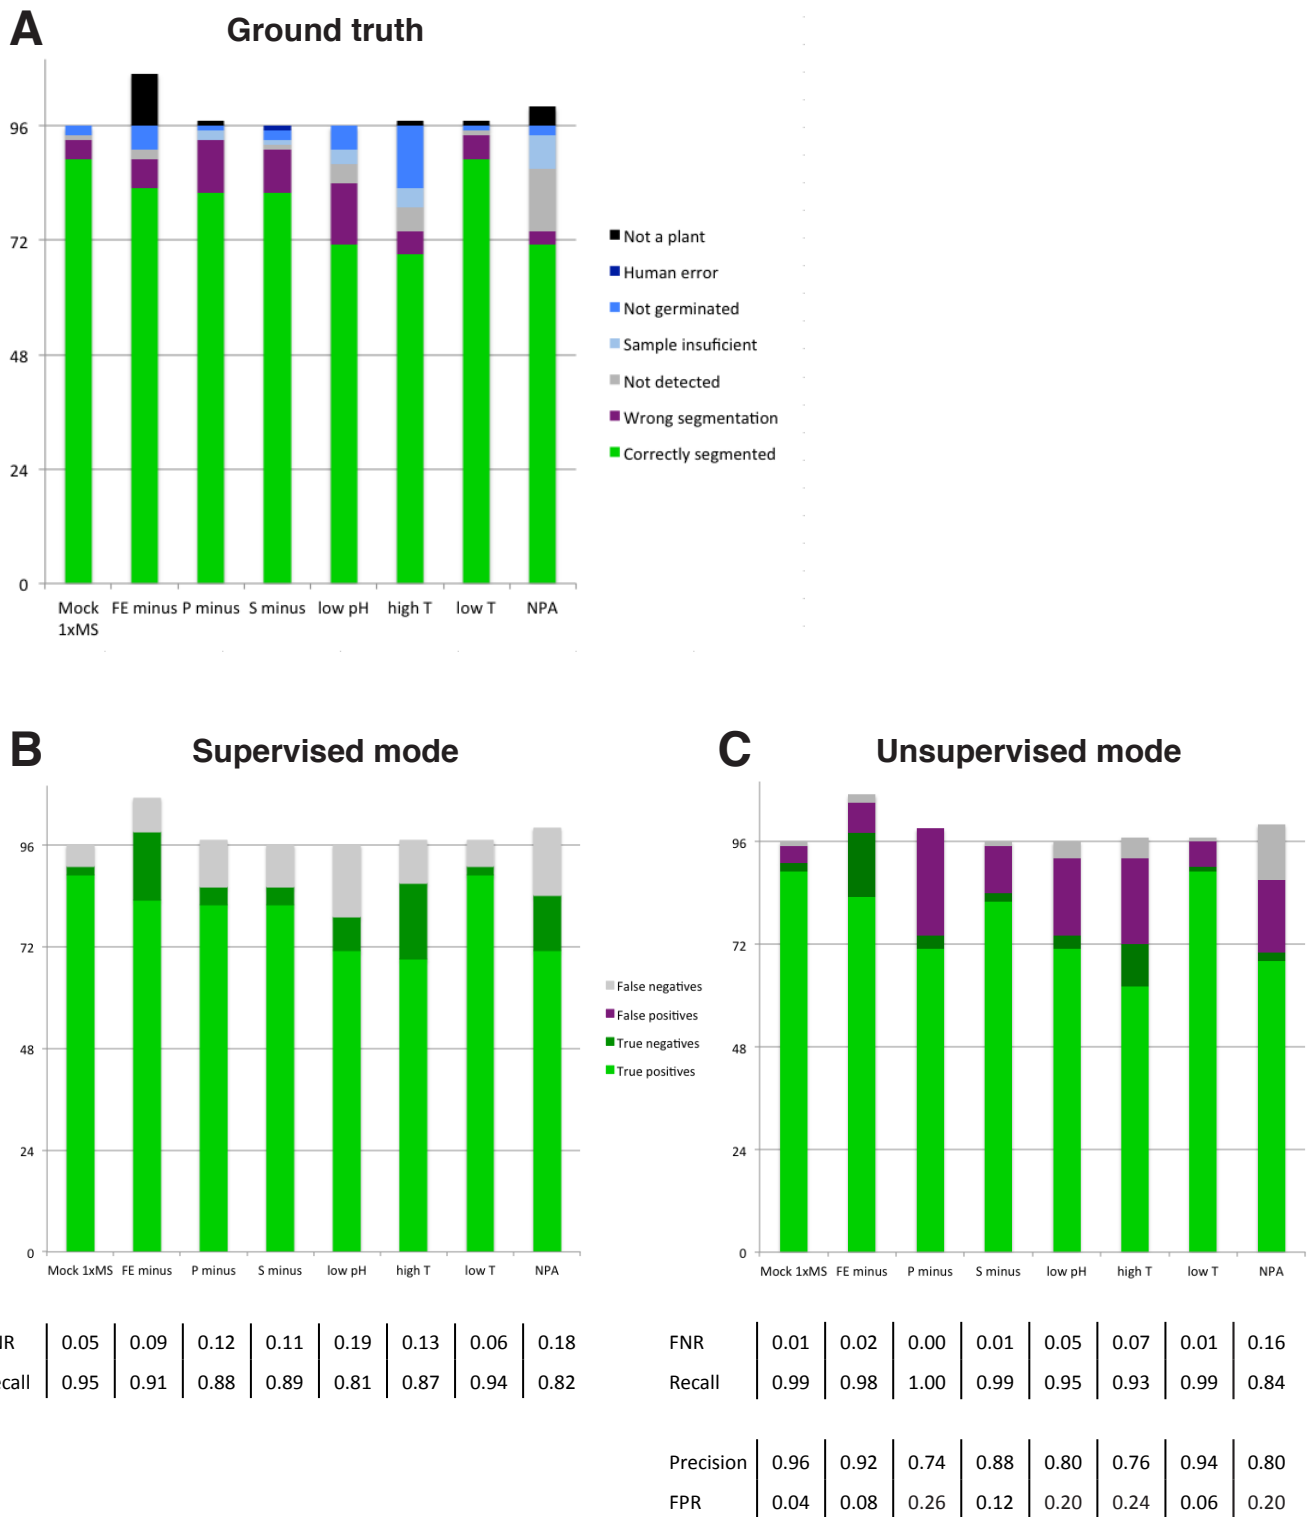

**Supplemental Figure 5.**

Performance of BRAT under various experimental conditions

(A) Classes of objects after the image segmentation prior to optional validation step.

(B) BRAT output, false negative rates under supervised user scenario.

(C) BRAT output, false negative and false positive rates in unsupervised mode.

**A**

| Accession                                        | Ct-1                                                                              | Gu-0                                                                              | Hov4-1                                                                             | En-1                                                                                | Brö1-6                                                                              |
|--------------------------------------------------|-----------------------------------------------------------------------------------|-----------------------------------------------------------------------------------|------------------------------------------------------------------------------------|-------------------------------------------------------------------------------------|-------------------------------------------------------------------------------------|
| Exemplary root images<br>day2 day3               | 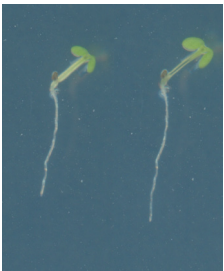 |  |  |  |  |
| Primary root length (day 2) [mm]                 | 7.1                                                                               | 9.5                                                                               | 10.6                                                                               | 7.5                                                                                 | 7.4                                                                                 |
| Root growth rate (day 2 - 3) [mm/day]            | 2.2                                                                               | 2.6                                                                               | 3.6                                                                                | 2.9                                                                                 | 2.7                                                                                 |
| Relative root growth rate (day 2 - 3) [% growth] | 0.31                                                                              | 0.27                                                                              | 0.34                                                                               | 0.38                                                                                | 0.36                                                                                |

**B**

| Accession                                        | Ba-1                                                                                | Nok-3                                                                               | HR-5                                                                                 | N13                                                                                   | Hau-0                                                                                 |
|--------------------------------------------------|-------------------------------------------------------------------------------------|-------------------------------------------------------------------------------------|--------------------------------------------------------------------------------------|---------------------------------------------------------------------------------------|---------------------------------------------------------------------------------------|
| Exemplary root images<br>day2 day3               | 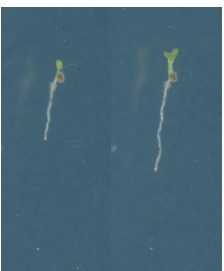 |  |  |  |  |
| Primary root length (day 2) [mm]                 | 3.1                                                                                 | 2.7                                                                                 | 2.9                                                                                  | 2.3                                                                                   | 2.8                                                                                   |
| Root growth rate (day 2 - 3) [mm/day]            | 2.3                                                                                 | 2.3                                                                                 | 2.9                                                                                  | 2.2                                                                                   | 3.5                                                                                   |
| Relative root growth rate (day 2 - 3) [% growth] | 0.75                                                                                | 0.86                                                                                | 0.99                                                                                 | 0.98                                                                                  | 1.25                                                                                  |

**Supplemental Figure 6.** Example images of the roots and trait values for extreme accessions for relative root growth rate

**(A)** Examples of extreme accessions with slow relative root growth rate

**(B)** Examples of extreme accessions with fast relative root growth rate

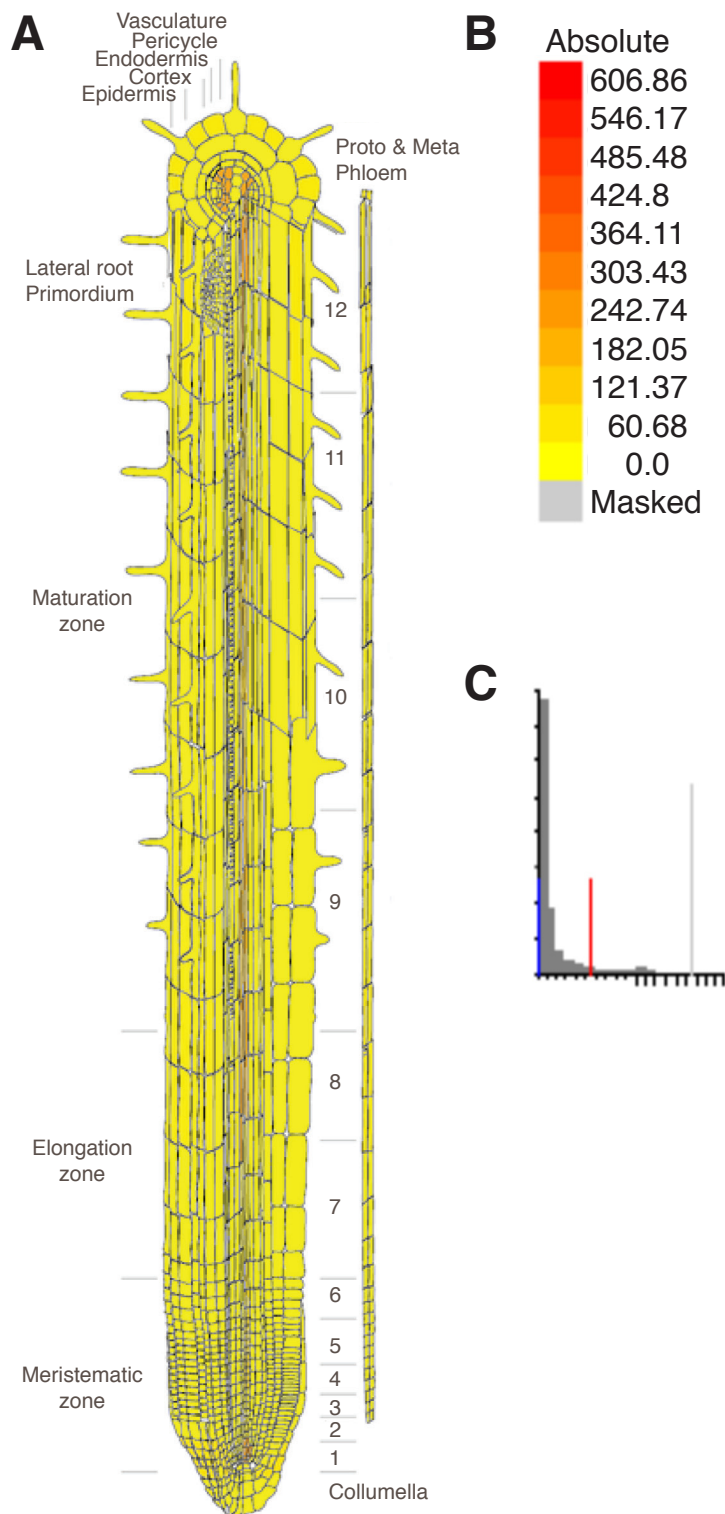

**Supplemental Figure 7.** Abundance of *CaS* (AT5G23060) transcript in the root

**(A)** Spatiotemporal map of expression of AT5G23060 in the root; obtained from eFP browser (Brady et al., 2007; Winter et al., 2007).

**(B)** Color scale depicts expression level in tissue.

**(C)** Histogram of average expression level of all genes in root data set. Red line in histogram indicates maximum expression of AT5G23060.

Brady, S.M., Orlando, D.A., Lee, J.Y., Wang, J.Y., Koch, J., Dinneny, J.R., Mace, D., Ohler, U., and Benfey, P.N. (2007). A high-resolution root spatiotemporal map reveals dominant expression patterns. *SCIENCE* **318**, 801-806.

Winter, D., Vinegar, B., Nahal, B., Ammar, R., Wilson, G.V., and Provart, N.J. (2007). An "Electronic Fluorescent Pictograph" Browser for Exploring and Analyzing Large-Scale Biological Data Sets. *PLoS ONE* **2(8)**, e718.

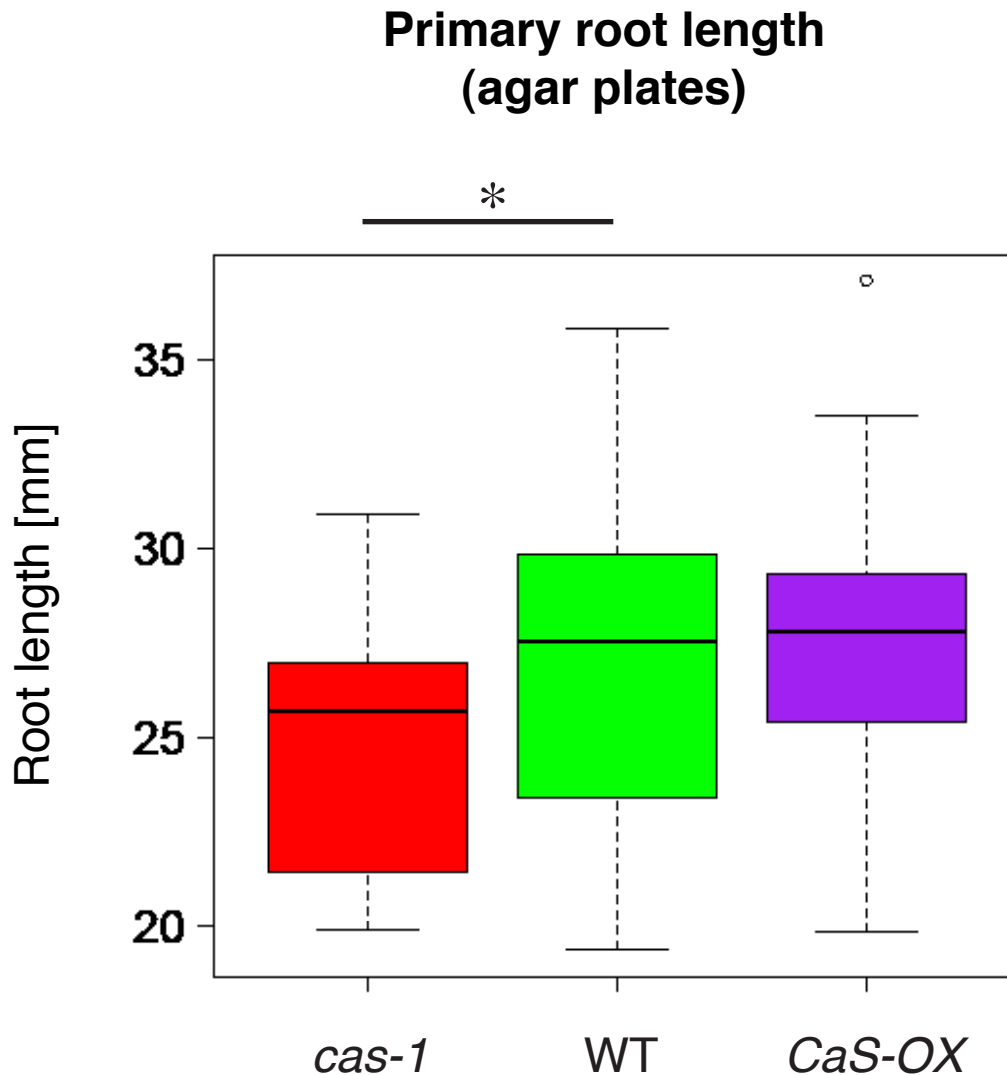

**Supplemental Figure 8.** Effects of loss of function and overexpression of *CaS* gene on primary root length on agar plates

Boxplot showing primary root length on day 7 after germination in loss of function and 35S overexpression lines of the *CaS* gene (N > 29); x-axis: genotype; y-axis: primary root length [mm]; whiskers:  $\pm 1.5$  times the interquartile range (IQR); Student's t-test p-value = 0.013 indicated by: (\*).



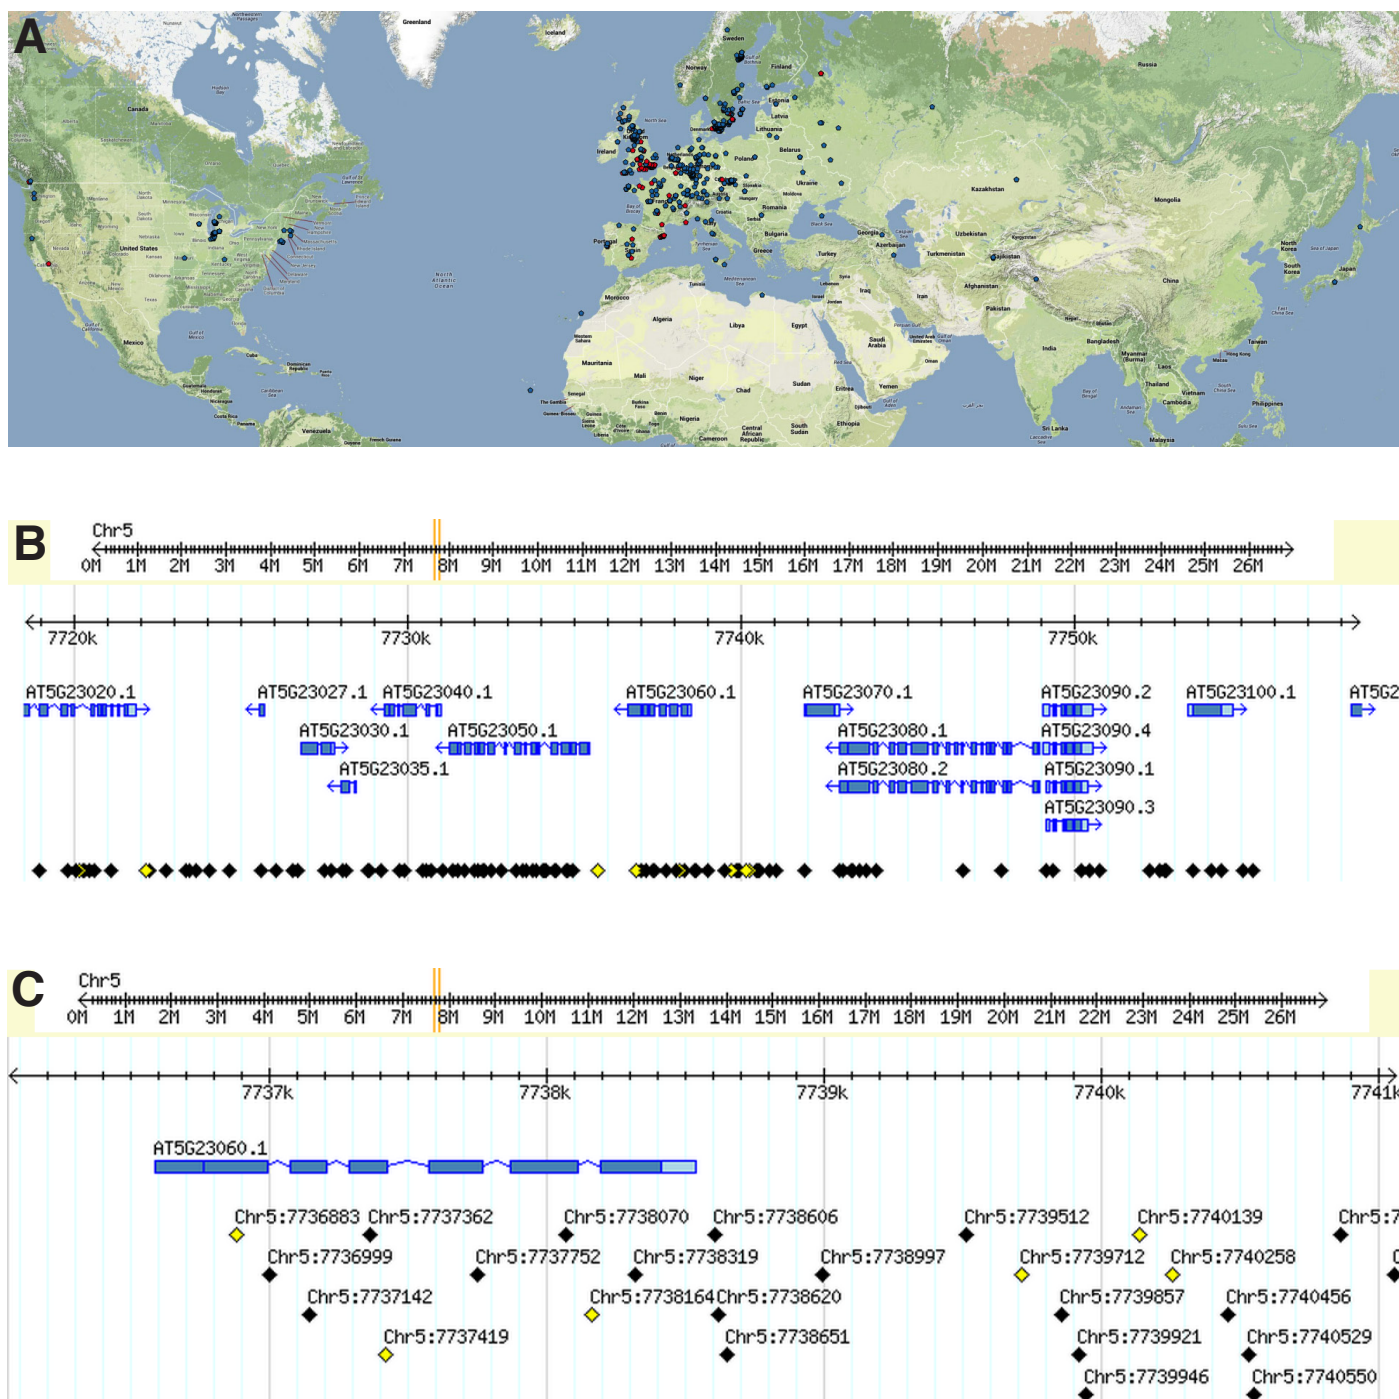

**Supplemental Figure 9.** Worldwide distribution of alleles for top *CaS* SNP and signs of selection at the *CaS* genomic locus

(A) Geographic distribution of the top *CaS* SNP alleles in 1307 accessions from the RegMap panel (Horton *et al.*, 2012) in the northern hemisphere. *CaS* major alleles at the chromosome 5 position 7738620 (T) are depicted as blue stars, whereas minor alleles (A) are depicted as red stars.

(B), (C) Signs of possible selection in *CaS* genomic locus ( $F_{ST}$  p-value < 0.01 shown as yellow diamonds; Horton *et al.*, 2012), screenshots from <http://regmap.uchicago.edu/cgi-bin/gbrowse/arabidopsis/>; 40 kb window centered on *CaS* gene (AT5G23060) (B) and enlarged view for *CaS* genomic locus (C).

Horton, M.W., Hancock, A.M., Huang, Y.S., Toomajian, C., Atwell, S., Auton, A., Muliya, N.W., Platt, A., Sperone, F.G., Vilhjalms, B.J., Nordborg, M., Borevitz, J.O., and Bergelson, J. (2012). Genome-wide patterns of genetic variation in worldwide *Arabidopsis thaliana* accessions from the RegMap panel. *Nat Genet* 44, 212-216.

**A**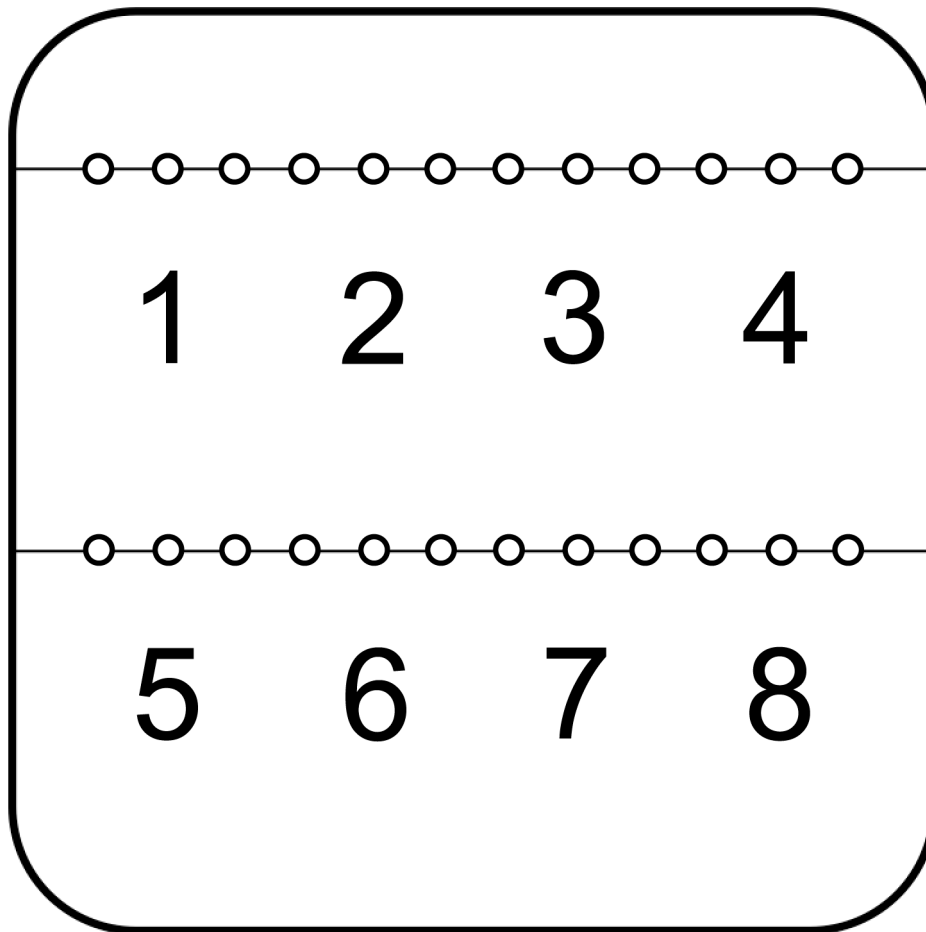**B**

|        |   | sections |     |     |     |     |     |     |     |
|--------|---|----------|-----|-----|-----|-----|-----|-----|-----|
|        |   | 1        | 2   | 3   | 4   | 5   | 6   | 7   | 8   |
| plates | 1 | AAA      | BBB | CCC | DDD | EEE | FFF | GGG | HHH |
|        | 2 | HHH      | AAA | BBB | CCC | DDD | EEE | FFF | GGG |
|        | 3 | GGG      | HHH | AAA | BBB | CCC | DDD | EEE | FFF |
|        | 4 | FFF      | GGG | HHH | AAA | BBB | CCC | DDD | EEE |
|        | 5 | EEE      | FFF | GGG | HHH | AAA | BBB | CCC | DDD |
|        | 6 | DDD      | EEE | FFF | GGG | HHH | AAA | BBB | CCC |
|        | 7 | CCC      | DDD | EEE | FFF | GGG | HHH | AAA | BBB |
|        | 8 | BBB      | CCC | DDD | EEE | FFF | GGG | HHH | AAA |

**Supplemental Figure 10.** Grid layout template and positional permutations

**(A)** Grid is placed under the plate to guide the biologist to precise placement of the seeds on the agar medium surface. Multiple genotypes can be used per one plate (e.g. eight with three replicates on this template). **(B)** Permuted block design was used to account for positional effects within and between Petri dishes. Schematic of the permutations for three replicates from each of eight accession on eight plates.

**A**

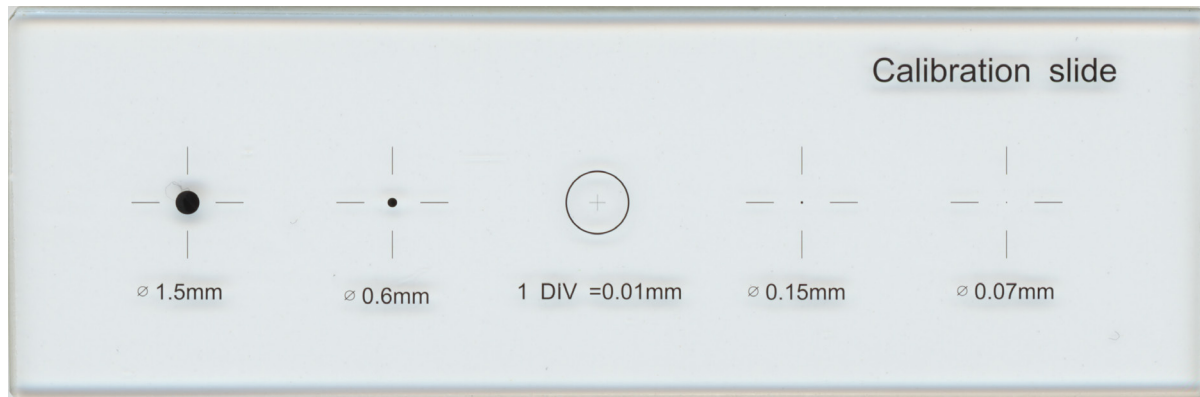

**B**

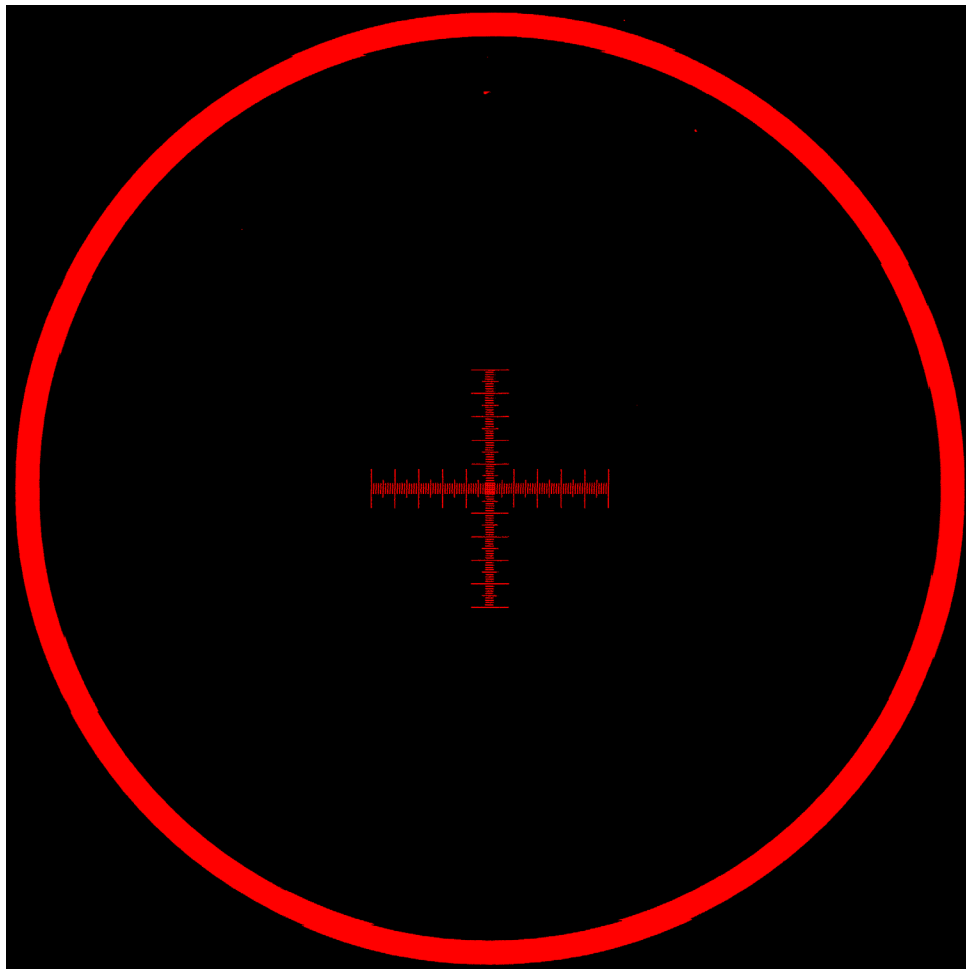

**Supplemental Figure 11.** Microscope calibration slide

**(A)** Calibration slide scanned by the scanners used for image-acquisition.

**(B)** 10 µm scale imaged with Zeiss LSM 700 confocal microscope. The 10µm scale was used to estimate the scanners maximal real resolution to be 50 µm.

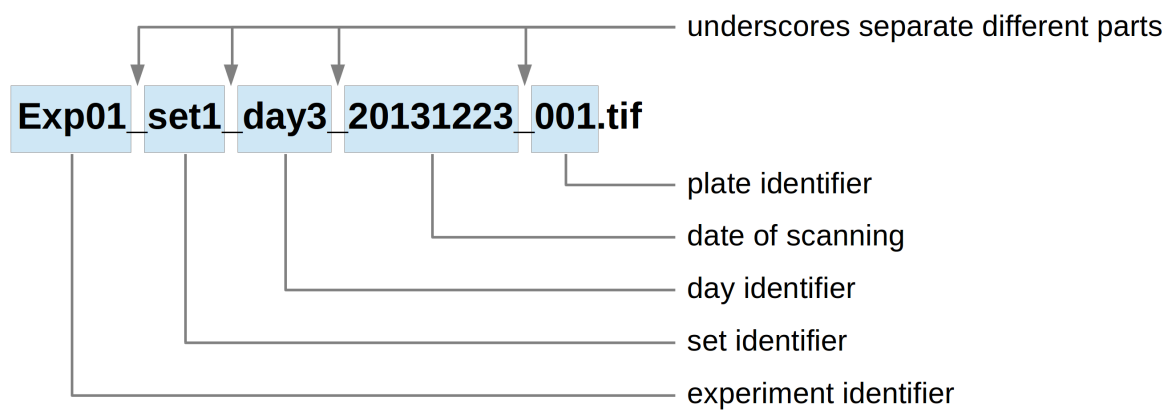

**Supplemental Figure 12.** The naming pattern supported by BRAT

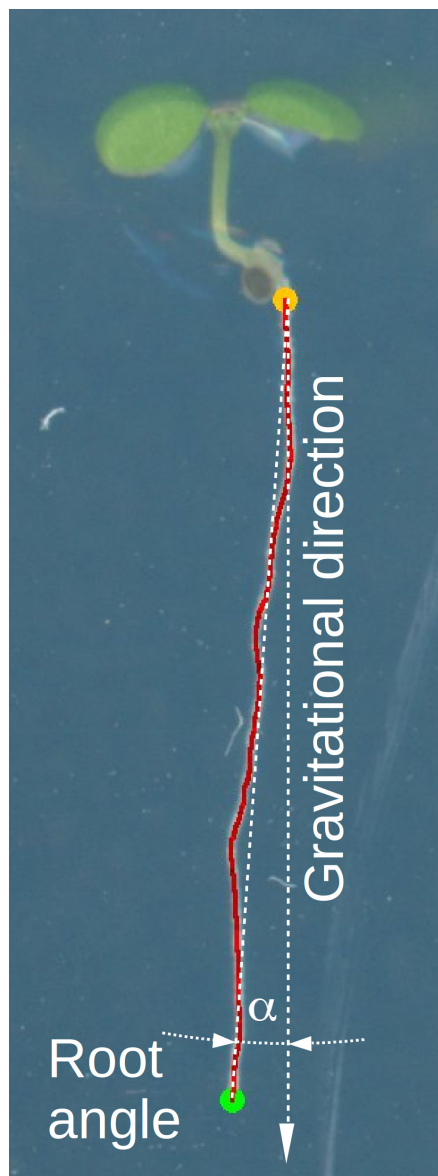

**Supplemental Figure 13.** Illustration of root angle trait

The root angle describes the angle between the root vector (the line through the root's start and end point) and the y-axis (assumed vector of gravity).

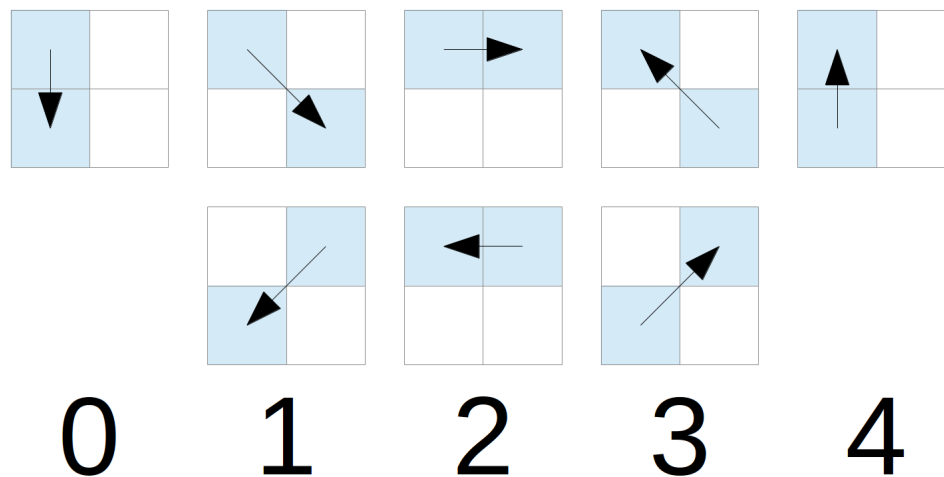

#### Supplemental Figure 14. Calculation of root direction index

For calculating the “root directional equivalent” we follow the path of the skeletonized main root from start point to end point. Each time we move from one pixel to the next a certain value (according to the scheme in the figure) gets added. For example, if we move straight downwards a value of 0 is added, in case of diagonal downwards direction, the value will be 1. The total sum is then divided by the number of pixels visited. The more gravitropic the root grows the lower the value, the less gravitropic the root grows, the higher the value.

| set_nr. | plate_nr. | plate_id | acc_id     | row | column |
|---------|-----------|----------|------------|-----|--------|
| 1       | 1         | 1        | genotype-1 | 1   | 1      |
| 1       | 1         | 1        | genotype-1 | 1   | 2      |
| 1       | 1         | 1        | genotype-1 | 1   | 3      |
| 1       | 1         | 1        | genotype-2 | 1   | 4      |
| 1       | 1         | 1        | genotype-2 | 1   | 5      |
| 1       | 1         | 1        | genotype-2 | 1   | 6      |
| 1       | 1         | 1        | genotype-3 | 1   | 7      |
| 1       | 1         | 1        | genotype-3 | 1   | 8      |
| 1       | 1         | 1        | genotype-3 | 1   | 9      |
| 1       | 1         | 1        | genotype-4 | 1   | 10     |
| 1       | 1         | 1        | genotype-4 | 1   | 11     |
| 1       | 1         | 1        | genotype-4 | 1   | 12     |
| 1       | 1         | 1        | genotype-5 | 2   | 1      |
| 1       | 1         | 1        | genotype-5 | 2   | 2      |
| 1       | 1         | 1        | genotype-5 | 2   | 3      |
| 1       | 1         | 1        | genotype-6 | 2   | 4      |
| 1       | 1         | 1        | genotype-6 | 2   | 5      |
| 1       | 1         | 1        | genotype-6 | 2   | 6      |
| 1       | 1         | 1        | genotype-7 | 2   | 7      |
| 1       | 1         | 1        | genotype-7 | 2   | 8      |
| 1       | 1         | 1        | genotype-7 | 2   | 9      |
| 1       | 1         | 1        | genotype-8 | 2   | 10     |
| 1       | 1         | 1        | genotype-8 | 2   | 11     |
| 1       | 1         | 1        | genotype-8 | 2   | 12     |

**Supplemental Table 1.** Genotype layout file

Short exemplary genotype layout text file for one plate containing three replicates for each of eight different genotypes (in total 24 plants in two rows).

|                                        | <b>EZ-Rhizo</b><br>(Armengaud <i>et al.</i> , 2009)                 | <b>RootReader2D</b><br>(Clark <i>et al.</i> , 2013) | <b>SmartRoot</b><br>(Lobet <i>et al.</i> , 2011) | <b>RootTrace</b><br>(French <i>et al.</i> , 2009) | <b>BRAT desktop</b><br>QC: manual               | <b>BRAT cluster</b><br>QC: manual                           | <b>BRAT desktop</b><br>QC: automated            | <b>BRAT cluster</b><br>QC: automated                        |
|----------------------------------------|---------------------------------------------------------------------|-----------------------------------------------------|--------------------------------------------------|---------------------------------------------------|-------------------------------------------------|-------------------------------------------------------------|-------------------------------------------------|-------------------------------------------------------------|
| <b>Image segmentation</b>              | 53.18 min<br>(27.04 s/root)                                         | 40.85 min<br>(20.78 s / root)                       | 30.95 min<br>(15.74 s / root)                    | 11.72 min<br>(5.96 s / root)                      | 3.97 min<br>(2.02 s / root)                     | 2 min<br>(one image on one cluster node)                    | 3.97 min<br>(2.02 s / root)                     | 2 min<br>(one image on one cluster node)                    |
| <b>Tested on</b>                       | Intel Core 7 @ 2.8 GHz; 3 GB RAM assigned to WIN XP virtual machine | Intel Core 5 CPU 650 @ 3.20 GHz; 4 GB RAM WIN 7     | Intel Core 5 CPU 650 @ 3.20 GHz; 4 GB RAM WIN 7  | Intel Core 5 CPU 650 @ 3.20 GHz; 4 GB RAM WIN 7   | Intel Core 5 CPU 650 @ 3.20 GHz; 4 GB RAM WIN 7 | Intel Xeon CPU E5520 @ 2.27GHz; 12 GB RAM (node on cluster) | Intel Core 5 CPU 650 @ 3.20 GHz; 4 GB RAM WIN 7 | Intel Xeon CPU E5520 @ 2.27GHz; 12 GB RAM (node on cluster) |
| <b>Quality control mode</b>            | validation step intrinsic                                           | validation step intrinsic                           | validation step intrinsic                        | not supported                                     | optional validation manual:                     | optional validation manual:                                 | optional validation automated:                  | optional validation automated:                              |
| <b>QC time requirements</b>            | included in image segmentation                                      | included in image segmentation                      | included in image segmentation                   | not supported                                     | 7.6 min<br>(3.87 s / root)                      | 7.6 min<br>(3.87 s / root)                                  | one time: 1.0 min                               | one time: 1.0 min                                           |
| <b>Estimated time for 19 560 roots</b> | 147 hours                                                           | 113 hours                                           | 86 hours                                         | 32.4 hours                                        | 32.0 hours<br>(11 + 21 hours)                   | 21 hours<br>(2 min + 21 hours)                              | 11 hours<br>(11 hours + 1 min)                  | 3 min<br>(2 min + 1 min)                                    |
| <b>QC tested on</b>                    | same as above                                                       | same as above                                       | same as above                                    | not supported                                     | Intel Core 5 CPU 650 @ 3.20 GHz; 4 GB RAM WIN 7 | Intel Core 5 CPU 650 @ 3.20 GHz; 4 GB RAM WIN 7             | Intel Core 5 CPU 650 @ 3.20 GHz; 4 GB RAM WIN 7 | Intel Core 5 CPU 650 @ 3.20 GHz; 4 GB RAM WIN 7             |
| <b>Image size</b>                      | 6.4 MB                                                              | 397 KB                                              | 8.5 MB                                           | 700 KB                                            | 25.7 MB                                         | 25.7 MB                                                     | 25.7 MB                                         | 25.7 MB                                                     |
| <b>Image resolution</b>                | 300 dpi                                                             | 300 dpi                                             | 600 dpi                                          | 600 dpi                                           | 600 dpi*                                        | 600 dpi*                                                    | 600 dpi*                                        | 600 dpi*                                                    |
| <b>Image type</b>                      | RGB .bmp                                                            | RGB .jpg                                            | greyscale .tif                                   | RGB .jpg                                          | RGB .tif                                        | RGB .tif                                                    | RGB .tif                                        | RGB .tif                                                    |

## Supplemental Table 2.

Time requirements of high-throughput root phenotyping software

Performance evaluation was based on the same 5 images of plates containing in total 118 plants. Image formats and resolution were chosen according to software specifications and to allow for good performance of the evaluated software.

(\*) these images were downsampled to allow comparison with other software.

**Armengaud, P., Zambaux, K., Hills, A., Sulpice, R., Pattison, R.J., Blatt, M.R., and Amtmann, A. (2009).** EZ-Rhizo: integrated software for the fast and accurate measurement of root system architecture. *PLANT JOURNAL* 57, 945-956.

**Clark, R.T., Famoso, A.N., Zhao, K., Shaff, J.E., Craft, E.J., Bustamante, C.D., McCouch, S.R., Aneshansley, D.J., and Kochian, L.V. (2013).** High-throughput two-dimensional root system phenotyping platform facilitates genetic analysis of root growth and development. *Plant Cell Environ* 36, 454-466.

**Lobet, G., Pages, L., and Draye, X. (2011).** A novel image-analysis toolbox enabling quantitative analysis of root system architecture. *Plant Physiol* 157, 29-39.

**French, A., Ubeda-Tomas, S., Holman, T.J., Bennett, M.J., and Pridmore, T. (2009).** High-throughput quantification of root growth using a novel image-analysis tool. *Plant Physiol* 150, 1784-1795.



| <b>Name</b>      | <b>Origin</b> | <b>GWAS ID</b> | <b>Name</b>        | <b>Origin</b> | <b>GWAS ID</b> |
|------------------|---------------|----------------|--------------------|---------------|----------------|
| <b>Aa-0</b>      | GER           | 7000           | <b>Ct-1</b>        | ITA           | 6910           |
| <b>Ak-1</b>      | GER           | 6987           | <b>CUR-8</b>       | FRA           | 86             |
| <b>Algutsrum</b> | SWE           | 8230           | <b>Cvi-0</b>       | CPV           | 6911           |
| <b>Amel-1</b>    | NLD           | 6990           | <b>Da-0</b>        | GER           | 7094           |
| <b>An-1</b>      | BEL           | 6898           | <b>Dem-4</b>       | USA           | 8233           |
| <b>Ang-0</b>     | BEL           | 6992           | <b>Di-1</b>        | FRA           | 7098           |
| <b>Arby-1</b>    | SWE           | 6998           | <b>Do-0</b>        | GER           | 7102           |
| <b>Ba-1</b>      | UK            | 7014           | <b>Drall-1</b>     | CZE           | 8284           |
| <b>Bå1-2</b>     | SWE           | 8256           | <b>Dralll-1</b>    | CZE           | 8285           |
| <b>Bå4-1</b>     | SWE           | 8258           | <b>Duk</b>         | CZE           | 6008           |
| <b>Bå5-1</b>     | SWE           | 8259           | <b>Eden-2</b>      | SWE           | 6913           |
| <b>Baa-1</b>     | NLD           | 7002           | <b>Edinburgh-5</b> | UK            | 9302           |
| <b>Bay-0</b>     | GER           | 6899           | <b>Eds-1</b>       | SWE           | 6016           |
| <b>Bch-1</b>     | GER           | 7028           | <b>Ei-2</b>        | GER           | 6915           |
| <b>Benk-1</b>    | NLD           | 7008           | <b>EM-183</b>      | UK            | 461            |
| <b>Bla-1</b>     | ESP           | 7015           | <b>Ema-1</b>       | UK            | 5736           |
| <b>Boot-1</b>    | UK            | 7026           | <b>En-1</b>        | GER           | 8290           |
| <b>Bor-1</b>     | CZE           | 5837           | <b>Ep-0</b>        | GER           | 7123           |
| <b>Bor-4</b>     | CZE           | 6903           | <b>Es-0</b>        | FIN           | 7126           |
| <b>Br-0</b>      | CZE           | 6904           | <b>Est-1</b>       | RUS           | 6916           |
| <b>Brö1-6</b>    | SWE           | 8231           | <b>Fåb-4</b>       | SWE           | 6918           |
| <b>Bs-1</b>      | SUI           | 8270           | <b>Fei-0</b>       | POR           | 8215           |
| <b>Bs-2</b>      | SUI           | 7004           | <b>FOR-5</b>       | UK            | 936            |
| <b>Bsch-0</b>    | GER           | 7031           | <b>Frd-1</b>       | UK            | 5742           |
| <b>Bu-0</b>      | GER           | 8271           | <b>Ga-0</b>        | GER           | 6919           |
| <b>Bur-0</b>     | IRL           | 5719           | <b>Gd-1</b>        | GER           | 8296           |
| <b>C24</b>       | POR           | 6906           | <b>Ge-0</b>        | SUI           | 8297           |
| <b>Ca-0</b>      | GER           | 7062           | <b>Gel-1</b>       | NLD           | 7143           |
| <b>Cala-8</b>    | ESP           | 9152           | <b>Gie-0</b>       | GER           | 7147           |
| <b>Can-0</b>     | ESP           | 8274           | <b>Got-22</b>      | GER           | 6920           |
| <b>Chat-1</b>    | FRA           | 7071           | <b>Got-7</b>       | GER           | 6921           |
| <b>Chr-1</b>     | UK            | 5723           | <b>Gr-1</b>        | AUT           | 8300           |
| <b>CIBC-17</b>   | UK            | 6907           | <b>Gu-0</b>        | GER           | 6922           |
| <b>CIBC-5</b>    | UK            | 6730           | <b>Gy-0</b>        | FRA           | 8214           |
| <b>Cit-0</b>     | FRA           | 7075           | <b>Ha-0</b>        | GER           | 7163           |
| <b>Co</b>        | POR           | 7081           | <b>Hau-0</b>       | DEK           | 7164           |
| <b>Coc-1</b>     | ESP           | 5729           | <b>Hey-1</b>       | NLD           | 7166           |
| <b>Col-0</b>     | USA           | 6909           | <b>Hh-0</b>        | GER           | 7169           |
| <b>Com-1</b>     | FRA           | 7092           | <b>Hi-0</b>        | NLD           | 8304           |
| <b>Cr1-1</b>     | UK            | 5731           | <b>Hil-1</b>       | UK            | 5745           |

| <b>Name</b>          | <b>Origin</b> | <b>GWAS ID</b> | <b>Name</b>       | <b>Origin</b> | <b>GWAS ID</b> |
|----------------------|---------------|----------------|-------------------|---------------|----------------|
| <b>HSm</b>           | CZE           | 8236           | <b>Lo-2</b>       | GER           | 7242           |
| <b>In-0</b>          | AUT           | 8311           | <b>Lp2-6</b>      | CZE           | 7521           |
| <b>Is-0</b>          | GER           | 8312           | <b>Map-42</b>     | USA           | 2057           |
| <b>Je-0</b>          | GER           | 7181           | <b>Mc-0</b>       | UK            | 7252           |
| <b>Jl-3</b>          | CZE           | 7424           | <b>Mdn-1</b>      | USA           | 1829           |
| <b>HI-3</b>          | GER           | 7172           | <b>MNF-Pot-80</b> | USA           | 1874           |
| <b>Hov4-1</b>        | SWE           | 8306           | <b>Mr-0</b>       | ITA           | 7522           |
| <b>HR-10</b>         | UK            | 6923           | <b>Mrk-0</b>      | GER           | 6937           |
| <b>HR-5</b>          | UK            | 6924           | <b>N13</b>        | RUS           | 7438           |
| <b>Hs-0</b>          | GER           | 8310           | <b>Nok-3</b>      | NLD           | 6945           |
| <b>Jm-0</b>          | CZE           | 8313           | <b>Nyl-2</b>      | SWE           | 6064           |
| <b>Jm-1</b>          | CZE           | 7178           | <b>ÖMö2-3</b>     | SWE           | 7519           |
| <b>Ka-0</b>          | AUT           | 8314           | <b>Ör-1</b>       | SWE           | 6074           |
| <b>Kelsterbach-4</b> | GER           | 8420           | <b>Ors-1</b>      | ROM           | 7283           |
| <b>Ker-38</b>        | USA           | 1782           | <b>Ost-0</b>      | SWE           | 8351           |
| <b>Kil-0</b>         | UK            | 7192           | <b>Pa-1</b>       | ITA           | 8353           |
| <b>Kin-0</b>         | USA           | 6926           | <b>Pent-1</b>     | USA           | 2187           |
| <b>KI-5</b>          | GER           | 7199           | <b>Pna-10</b>     | USA           | 7526           |
| <b>Kni-1</b>         | SWE           | 6040           | <b>Pna-17</b>     | USA           | 7523           |
| <b>Kno-10</b>        | USA           | 6927           | <b>Pro-0</b>      | ESP           | 8213           |
| <b>Kno-18</b>        | USA           | 6928           | <b>Rak-2</b>      | CZE           | 8365           |
| <b>Köln</b>          | GER           | 8239           | <b>Rev-1</b>      | SWE           | 8369           |
| <b>Kondara</b>       | TJK           | 6929           | <b>Rhen-1</b>     | NLD           | 7316           |
| <b>Kr-0</b>          | GER           | 7201           | <b>Rmx-A02</b>    | USA           | 7524           |
| <b>Krot-2</b>        | GER           | 7205           | <b>RRS-10</b>     | USA           | 7515           |
| <b>Kulturen-1</b>    | SWE           | 8240           | <b>RRS-7</b>      | USA           | 7514           |
| <b>Kyl-1</b>         | UK            | 5751           | <b>San-2</b>      | SWE           | 8247           |
| <b>Kz-1</b>          | KAZ           | 6930           | <b>Sanna-2</b>    | SWE           | 8376           |
| <b>Kz-9</b>          | KAZ           | 6931           | <b>Spr1-6</b>     | SWE           | 6965           |
| <b>La-1</b>          | GER           | 7210           | <b>Tamm-2</b>     | FIN           | 6968           |
| <b>LAC-5</b>         | LAC           | 96             | <b>Tamm-27</b>    | FIN           | 6969           |
| <b>Lag1-6</b>        | GEO           | 9104           | <b>Ting-1</b>     | SWE           | 7354           |
| <b>Lan-1</b>         | UK            | 5752           | <b>Tiv-1</b>      | ITA           | 7355           |
| <b>Lc-0</b>          | UK            | 8323           | <b>TOU-J-3</b>    | FRA           | 383            |
| <b>LDV-58</b>        | FRA           | 149            | <b>Ts-5</b>       | ESP           | 6971           |
| <b>Ler-1</b>         | GER           | 6932           | <b>Uod-7</b>      | AUT           | 6976           |
| <b>Li-3</b>          | GER           | 7224           | <b>Vår2-1</b>     | SWE           | 7516           |
| <b>Li-7</b>          | GER           | 7231           | <b>Ven-1</b>      | NLD           | 7384           |
| <b>Liarum</b>        | SWE           | 8241           | <b>Vimmerby</b>   | SWE           | 8249           |
| <b>Lip-0</b>         | POL           | 8325           | <b>Ws-2</b>       | RUS           | 6981           |
| <b>LL-0</b>          | ESP           | 6933           | <b>Yo-0</b>       | USA           | 6983           |
| <b>Lm-2</b>          | FRA           | 8329           |                   |               |                |

Supplemental Table 3. 163 accessions used in this study
